# Supplementary material for: Artificial Intelligence-Based Methods for Precision Cardiovascular Medicine
Source: MDPI journal article supplement (doi:10.3390/jpm13081268), 2023-08-16
Supplement: s1 [file s1]

### Search history

| Search string                                                                                                                                                                                                                                                                                                                                                                                                                                                                                                                                                                                                                                                                                                                                                                                                                                                                                                                                                                                                                                                                                                                                                                                                                                                                                                                                                                                                                                                                                                                                                                   | Database | # Of studies | Date        |
|---------------------------------------------------------------------------------------------------------------------------------------------------------------------------------------------------------------------------------------------------------------------------------------------------------------------------------------------------------------------------------------------------------------------------------------------------------------------------------------------------------------------------------------------------------------------------------------------------------------------------------------------------------------------------------------------------------------------------------------------------------------------------------------------------------------------------------------------------------------------------------------------------------------------------------------------------------------------------------------------------------------------------------------------------------------------------------------------------------------------------------------------------------------------------------------------------------------------------------------------------------------------------------------------------------------------------------------------------------------------------------------------------------------------------------------------------------------------------------------------------------------------------------------------------------------------------------|----------|--------------|-------------|
| ( TITLE-ABS-KEY ( "machine learning" ) OR TITLE-ABS-KEY ( "deep learning" ) OR TITLE-ABS-KEY ( "artificial intelligence" ) OR TITLE-ABS-KEY ( "neural network*" ) OR TITLE-ABS-KEY ( "Convolutional neural network*" ) OR TITLE-ABS-KEY ( "reinforcement learning" ) OR TITLE-ABS-KEY ( "transfer learning" ) OR TITLE-ABS-KEY ( "supervised learning" ) OR TITLE-ABS-KEY ( "unsupervised learning" ) OR TITLE-ABS-KEY ( "ensemble learning" ) OR TITLE-ABS-KEY ( "Support vector machine" ) OR TITLE-ABS-KEY ( "Artificial neural network*" ) OR TITLE-ABS-KEY ( "decision tree" ) OR TITLE-ABS-KEY ( "Random Forest" ) OR TITLE-ABS-KEY ( "Naïve Bayes" ) OR TITLE-ABS-KEY ( "Naive Bayes" ) OR TITLE-ABS-KEY ( "K- Nearest Neighbor*" ) OR TITLE-ABS-KEY ( "K-means" ) OR TITLE-ABS-KEY ( "Long Short-Term Memory Networks" ) OR TITLE-ABS-KEY ( "regression analysis" ) ) AND ( TITLE-ABS-KEY ( "precision medicine" ) OR TITLE-ABS-KEY ( "personalized medicine" ) OR TITLE-ABS-KEY ( "individualized medicine" ) ) AND ( TITLE-ABS-KEY ( "cardiovascular disease*" ) OR TITLE-ABS-KEY ( "stroke" ) OR TITLE-ABS-KEY ( "heart disease*" ) OR TITLE-ABS-KEY ( "aortic stenosis" ) OR TITLE-ABS-KEY ( "aortic disease*" ) OR TITLE-ABS-KEY ( "coronary arteries disease*" ) OR TITLE-ABS-KEY ( "hypertension" ) OR TITLE-ABS-KEY ( "atrial flutter" ) OR TITLE-ABS-KEY ( "heart failure " ) OR TITLE-ABS-KEY ( "atrial fibrillation" ) OR TITLE-ABS-KEY ( "cardiomyopathy" ) OR TITLE-ABS-KEY ( "rheumatic Heart Disease" ) OR TITLE-ABS-KEY ( "cardiology" ) ) AND ( LIMIT- | Scopus   | 474          | 30 Jan 2022 |

|                                                                                                                                                                                                                                                                                                                                                                                                                                                                                                                                                                                                                                                                                                                                                                                                                                                                                                                                                                                                                                                                                                                                                                                                                                                                                                                                                                                                                                                                                                                                       |        |     |             |
|---------------------------------------------------------------------------------------------------------------------------------------------------------------------------------------------------------------------------------------------------------------------------------------------------------------------------------------------------------------------------------------------------------------------------------------------------------------------------------------------------------------------------------------------------------------------------------------------------------------------------------------------------------------------------------------------------------------------------------------------------------------------------------------------------------------------------------------------------------------------------------------------------------------------------------------------------------------------------------------------------------------------------------------------------------------------------------------------------------------------------------------------------------------------------------------------------------------------------------------------------------------------------------------------------------------------------------------------------------------------------------------------------------------------------------------------------------------------------------------------------------------------------------------|--------|-----|-------------|
| TO ( PUBYEAR , 2022 ) OR LIMIT-<br>TO ( PUBYEAR , 2021 ) OR LIMIT-<br>TO ( PUBYEAR , 2020 ) OR LIMIT-<br>TO ( PUBYEAR , 2019 ) OR LIMIT-<br>TO ( PUBYEAR , 2018 ) OR LIMIT-<br>TO ( PUBYEAR , 2017 ) OR LIMIT-<br>TO ( PUBYEAR , 2016 ) OR LIMIT-<br>TO ( PUBYEAR , 2015 ) ) AND ( LIMIT-<br>TO ( LANGUAGE , "English" ) )                                                                                                                                                                                                                                                                                                                                                                                                                                                                                                                                                                                                                                                                                                                                                                                                                                                                                                                                                                                                                                                                                                                                                                                                            |        |     |             |
| ((("precision medicine"[Title/Abstract] OR<br>"personalized medicine"[Title/Abstract] OR<br>"individualized medicine"[Title/Abstract]) AND<br>("regression analysis"[Title/Abstract] OR "machine<br>learning"[Title/Abstract] OR "deep<br>learning"[Title/Abstract] OR "artificial<br>intelligence"[Title/Abstract] OR "convolutional<br>neural network*"[Title/Abstract] OR "reinforcement<br>learning"[Title/Abstract] OR "transfer<br>learning"[Title/Abstract] OR "neural<br>network*"[Title/Abstract] OR "supervised<br>learning"[Title/Abstract] OR "unsupervised<br>learning"[Title/Abstract] OR "ensemble<br>learning"[Title/Abstract] OR<br>"Autoencoder"[Title/Abstract] OR "support vector<br>machine"[Title/Abstract] OR "naive<br>bayes"[Title/Abstract] OR "decision<br>tree"[Title/Abstract] OR "random<br>forest"[Title/Abstract] OR "naive<br>bayes"[Title/Abstract] OR "k nearest<br>neighbor*"[Title/Abstract] OR "K-<br>means"[Title/Abstract] OR "long short term memory<br>networks"[Title/Abstract]) AND<br>("Cardiovascular"[Title/Abstract] OR<br>"stroke"[Title/Abstract] OR "heart<br>diseases"[Title/Abstract] OR "aortic<br>stenosis"[Title/Abstract] OR "aortic<br>diseases"[Title/Abstract] OR "coronary arteries<br>diseases"[Title/Abstract] OR<br>"hypertension"[Title/Abstract] OR "atrial<br>flutter"[Title/Abstract] OR "heart<br>failure"[Title/Abstract] OR "atrial<br>fibrillation"[Title/Abstract] OR<br>"cardiomyopathy"[Title/Abstract] OR "rheumatic<br>heart disease"[Title/Abstract] OR | Pubmed | 105 | 30 Jan 2022 |

|                                                                                 |                |     |             |
|---------------------------------------------------------------------------------|----------------|-----|-------------|
| "cardiology"[Title/Abstract])) AND<br>((medline[Filter]) AND (2015:2022[pdat])) |                |     |             |
| "cardio*" And "precision medicine" And "AI"                                     | Google scholar | 100 | 30 Jan 2022 |
